# Supplementary material for: The inflammatory cytokine TNF-α promotes the premature senescence of rat nucleus pulposus cells via the PI3K/Akt signaling pathway
Source: PubMed Central journal article supplement (PMC5314336; doi:10.1038/srep42938), 2017-02-17

# Inflammatory cytokine TNF- $\alpha$ promotes premature senescence of rat nucleus pulposus cells through PI3K/Akt signaling pathway

Pei Li <sup>1</sup>, Yibo Gan <sup>1</sup>, Yuan Xu <sup>2</sup>, Lei Song <sup>1</sup>, Liyuan Wang <sup>1</sup>, Bin Ouyang <sup>1</sup>, Chengmin Zhang <sup>1</sup>, Qiang Zhou <sup>1,\*</sup>

**Supplementary Table S1.** Primers of target genes

| Gene           | Accession number | Forward (5'-3')       | Reverse (5'-3')       |
|----------------|------------------|-----------------------|-----------------------|
| $\beta$ -actin | NM_031144.3      | CCGCGAGTACAACCTTCTTG  | TGACCCATACCCACCATCAC  |
| Aggrecan       | XM_002723376.1   | ATGGCATTGAGGACAGCGAA  | GCTCGGTCAAAGTCCAGTGT  |
| Collagen II    | NM_012929.1      | GCCAGGATGCCCGAAAATTAG | CCAGCCTTCTCGTCAAATCCT |
| p53            | XM_008767773.1   | CCTTAAGATCCGTGGGCGT   | GCTAGCAGTTTGGGCTTTCC  |
| p16            | NM_031550.1      | TACCCCGATACAGGTGATGA  | TACCGCAAATACCGCACGA   |

**Supplementary Table S2.** Primary and secondary antibodies used in this study (WB: Western blotting; ICC: Immunocytochemistry)

| Antibodies                    | Purchase information | Host   | Application and dilution        |
|-------------------------------|----------------------|--------|---------------------------------|
| Anti- $\beta$ -actin antibody | Proteintech          | Mouse  | 1:1000 for WB                   |
| Anti-Aggregan antibody        | Norvus               | Mouse  | 1:200 for ICC                   |
| Anti-Collagen II antibody     | Abcam                | Rabbit | 1:200 for ICC                   |
| Anti-p53 antibody             | Proteintech          | Rabbit | 1:1000 for WB                   |
| Anti-p16 antibody             | Norvus               | Mouse  | 1:1000 for WB                   |
| Anti-Akt antibody             | CST                  | Mouse  | 1:1000 for WB                   |
| Anti-p-Akt antibody           | CST                  | Rabbit | 1:1000 for WB                   |
| Goat anti-mouse IgG           | ZSGB-Bio, China      | Goat   | 1:2000 for WB and 1:200 for ICC |
| Goat anti-rabbit IgG          | ZSGB-Bio, China      | Goat   | 1:2000 for WB and 1:200 for ICC |

**Supplementary Figure S1.** Effects of PI3K/Akt pathway inhibition on cell viability and matrix biosynthesis of rat nucleus pulposus (NP) cells treated with TNF- $\alpha$  on day 1 and day 3. A: When the inhibitor LY294002 (10  $\mu$ M) was added into the culture medium of NP cells in the 10 ng/mL TNF- $\alpha$  group, the activation of the PI3K/Akt

pathway was significantly inhibited. B: There was no significant difference in cell viability before and after inhibiting the activation of the PI3K/Akt pathway in NP cells treated with 10 ng/mL TNF- $\alpha$ . C-E: Inhibitor LY294002 up-regulated gene expression of matrix molecules aggrecan and collagen II (C), increased glycosaminoglycan (GAG) content (D) and increased matrix deposition in rat NP cells on day 1 and day 3 (E). The data are expressed as the mean $\pm$ SD (n=3). \*: Indicates a significant difference ( $p < 0.05$ ) between the 10 ng/mL TNF- $\alpha$  group and the 10 ng/mL TNF- $\alpha$ +LY294002 group.

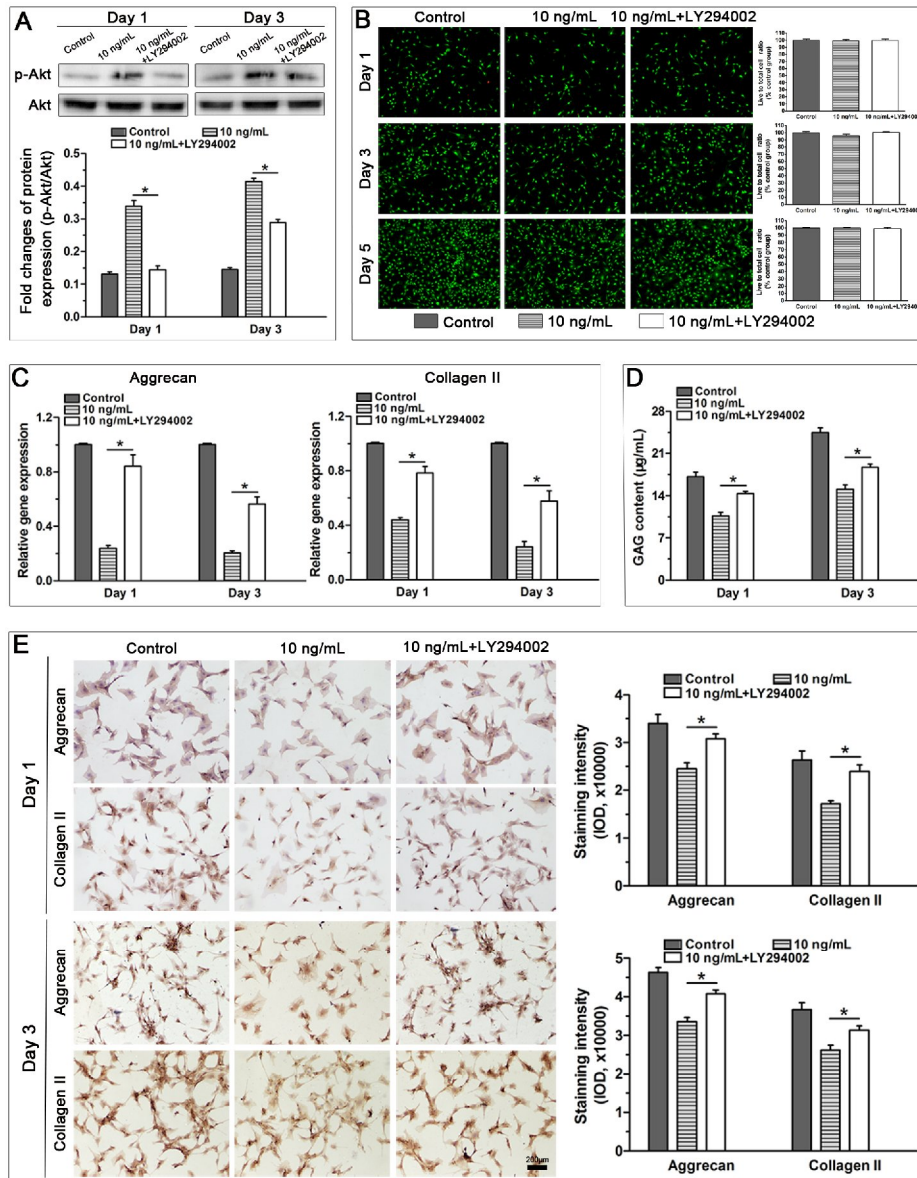

Supplement: srep42938-s1.pdf [file srep42938-s1.pdf]
